# Supplementary material for: Diversification Declines in Major Dinosaurian Clades are not Because of Edge Effects or Incomplete Fossil Sampling
Source: Research Square preprint supplement (doi:10.21203/rs.3.rs-907951/v1), 2021-10-11
Supplement: Supplementary file 1 [file e2e9347e8c33d024cef5b6f7.xlsx]

## Sheet: Model_001
Variable	Median_Coefficient	Number_Significant	Percent_Significant
(Intercept)	1.03347	100	100
Th	1.6726	100	100
O	1.31039	100	100
S	1.75645	100	100
C	1.69627	100	100
H	1.86358	100	100
Cenomanian	0.0224659	0	0
Turonian	0.0371403	0	0
Coniacian	0.0655373	0	0
Santonian	0.0460422	0	0
Campanian	0.0752424	100	100
Maastrichtian	0.0883887	100	100

## Sheet: Model_002
Variable	Median_Coefficient	Number_Significant	Percent_Significant
(Intercept)	1.04585	100	100
Th	1.49266	100	100
O	0.980161	100	100
S	1.50328	100	100
C	-1.13411	0	0
H	1.33376	100	100
Time_Th	0.00382259	100	100
Time_O	0.00432266	100	100
Time_S	0.00522714	100	100
Time_C	0.0176801	40	40
Time_H	0.00601377	100	100
Cenomanian	-0.0650079	1	1
Turonian	-0.0550912	0	0
Coniacian	-0.00476637	0	0
Santonian	-0.0680601	0	0
Campanian	-0.080441	100	100
Maastrichtian	-0.0869373	100	100

## Sheet: Model_003
Variable	Median_Coefficient	Number_Significant	Percent_Significant
(Intercept)	1.04607	100	100
Th	1.06869	100	100
O	0.467838	0	0
S	0.924079	99	99
C	-1.12811	0	0
H	1.35772	100	100
Time_C	0.0178668	45	45
Time_H	0.00617977	100	100
TimeSq_Th	0.0874935	100	100
TimeSq_O	0.0980541	100	100
TimeSq_S	0.117635	100	100
Cenomanian	-0.0672774	3	3
Turonian	-0.0543264	0	0
Coniacian	-0.00209363	0	0
Santonian	-0.0635955	0	0
Campanian	-0.0693571	100	100
Maastrichtian	-0.0717254	100	100

## Sheet: Model_004
Variable	Median_Coefficient	Number_Significant	Percent_Significant
(Intercept)	1.04224	99	99
Th	0.909446	100	100
O	0.0956134	0	0
S	0.972728	100	100
C	-1.10387	0	0
H	1.42288	100	100
Time_Th	0.0179867	100	100
Time_O	0.0218703	100	100
Time_S	0.0185308	100	100
Time_C	0.0179779	57	57
Time_H	0.00635931	100	100
Time2_Th	-6.05545e-05	100	100
Time2_O	-7.30831e-05	100	100
Time2_S	-5.6876e-05	100	100
Cenomanian	-0.0407104	0	0
Turonian	-0.0132884	0	0
Coniacian	0.0404114	0	0
Santonian	0.0113648	0	0
Campanian	0.0778127	98	98
Maastrichtian	0.113681	100	100

## Sheet: Model_005
Variable	Median_Coefficient	Number_Significant	Percent_Significant
(Intercept)	0.89547	93	93
Th	1.61032	100	100
O	1.22264	100	100
S	1.70093	100	100
C	1.53916	100	100
H	1.78456	100	100
N_Occ	0.0926436	100	100

## Sheet: Model_006
Variable	Median_Coefficient	Number_Significant	Percent_Significant
(Intercept)	0.983692	100	100
Th	1.55016	100	100
O	1.0456	100	100
S	1.52736	100	100
C	-0.92356	0	0
H	1.32251	100	100
Time_Th	0.00254555	100	100
Time_O	0.00316727	100	100
Time_S	0.00449145	100	100
Time_C	0.0160641	1	1
Time_H	0.00558205	100	100
N_Occ	0.0364716	90	90

## Sheet: Model_007
Variable	Median_Coefficient	Number_Significant	Percent_Significant
(Intercept)	0.980557	100	100
Th	1.22985	100	100
O	0.629409	5	5
S	1.00368	100	100
C	-0.903701	0	0
H	1.35479	100	100
Time_C	0.016235	11	11
Time_H	0.00576373	100	100
TimeSq_Th	0.0648707	100	100
TimeSq_O	0.077019	100	100
TimeSq_S	0.105207	100	100
N_Occ	0.0361847	93	93

## Sheet: Model_008
Variable	Median_Coefficient	Number_Significant	Percent_Significant
(Intercept)	0.912147	95	95
Th	0.988321	100	100
O	0.15891	0	0
S	0.981889	100	100
C	-0.585787	0	0
H	1.4513	100	100
Time_Th	0.0149061	100	100
Time_O	0.018927	100	100
Time_S	0.0172366	100	100
Time_C	0.0143372	1	1
Time_H	0.00555922	100	100
Time2_Th	-4.76114e-05	100	100
Time2_O	-6.01003e-05	100	100
Time2_S	-4.93928e-05	100	100
N_Occ	0.081732	100	100

## Sheet: Model_009
Variable	Median_Coefficient	Number_Significant	Percent_Significant
(Intercept)	1.03677	100	100
Th	1.67115	100	100
O	1.30805	100	100
S	1.75366	100	100
C	1.68301	100	100
H	1.86052	100	100
Campanian	0.0700966	99	99
Maastrichtian	0.0829386	100	100

## Sheet: Model_010
Variable	Median_Coefficient	Number_Significant	Percent_Significant
(Intercept)	1.04421	100	100
Th	1.50439	100	100
O	0.997807	100	100
S	1.5133	100	100
C	-1.13822	0	0
H	1.33023	100	100
Time_Th	0.00359989	100	100
Time_O	0.00413062	100	100
Time_S	0.00506504	100	100
Time_C	0.0177122	36	36
Time_H	0.00599554	100	100
Campanian	-0.0647424	100	100
Maastrichtian	-0.0712731	100	100

[truncated: 9 more sheets: Model_011, Model_012, Model_013, Model_014, Model_015, Model_016, Model_017, Model_018, Model_019]
